# Supplementary material
Source: PubMed Central journal article supplement (PMC3177949)
Supplement: Supp_Data.pdf [file Supp_Data.pdf]

## Supplementary Data

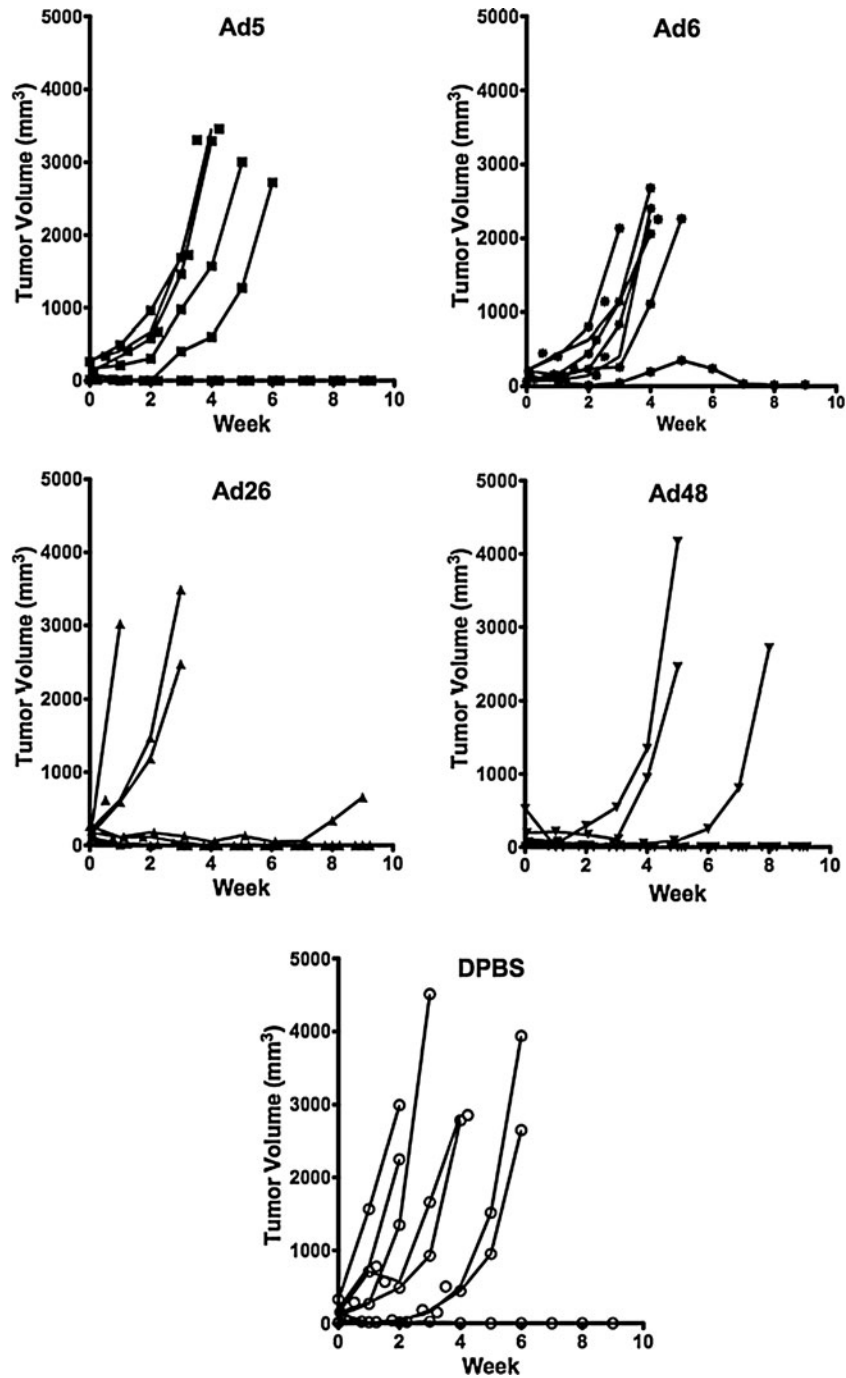

**SUPPLEMENTARY FIG. S1.** Individual tumor volumes for the wild-type Ad-treated groups. Groups of seven or eight mice were injected with A20 cells. The palpable tumors were injected intratumorally with  $3 \times 10^{10}$  VP of the wild-type viruses that induced the greatest levels of killing *in vivo*.
